# Supplementary material for: Changes in Mediterranean flood processes and seasonality
Source: Copernicus journal article supplement (doi:10.5194/hess-27-2973-2023), 2023-08-11
Supplement: Supplementary file 1 [file hess-27-2973-2023-supplement.pdf]

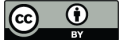

*Supplement of*

## **Changes in Mediterranean flood processes and seasonality**

**Yves Tramblay et al.**

*Correspondence to:* Yves Tramblay (yves.tramblay@ird.fr)

The copyright of individual parts of the supplement might differ from the article licence.

## Supplementary materials

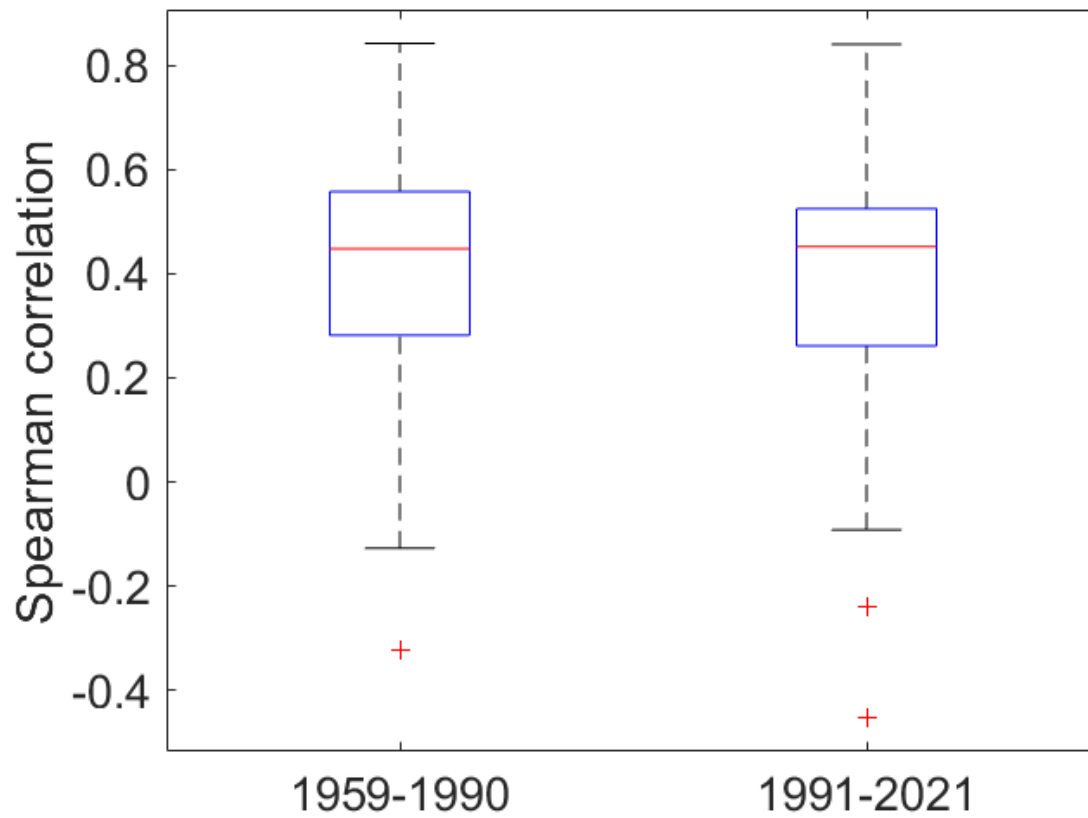

Figure S1: Spearman correlation coefficients between runoff coefficients and antecedent soil moisture. For each box, the central mark indicates the median, and the bottom and top edges of the box indicate the 25th and 75th percentiles, respectively. The whiskers extend to the 99% of the data and the 1% outliers are plotted with the '+' marker symbol.

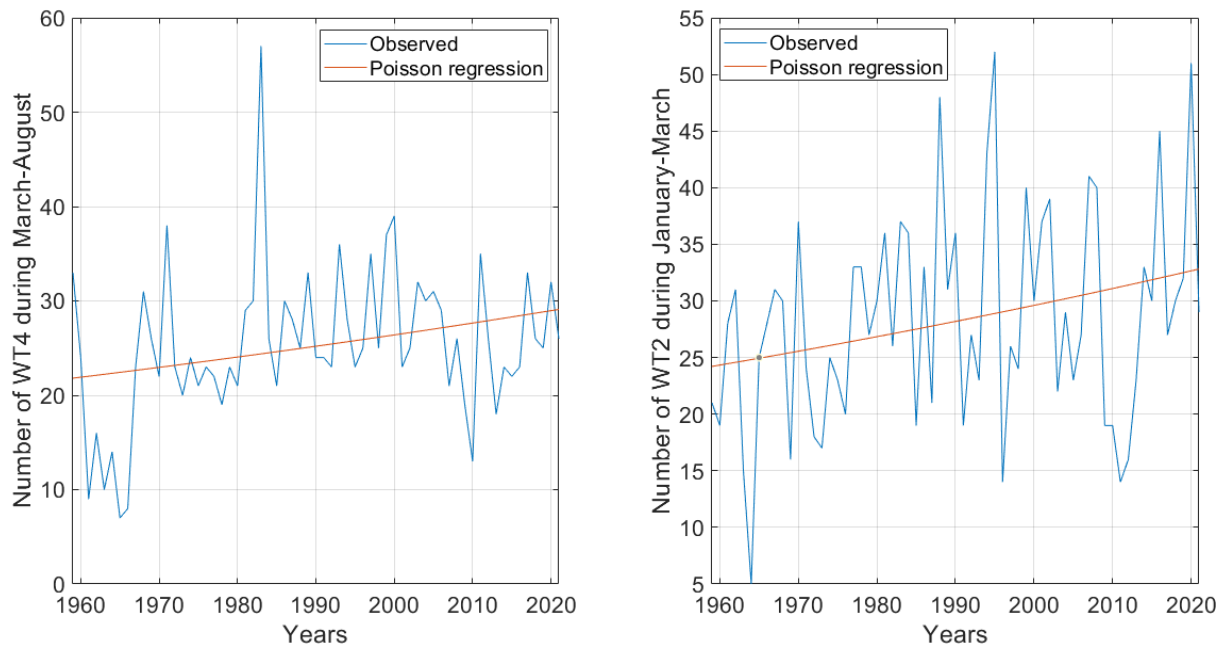

Figure S2: Annual number of weather type 4 (WT4), describing a Southern circulation, in the left panel, and annual number of weather type 2 (WT2), describing a Steady Oceanic circulation, right panel, between 1959 and 2021. The annual counts have been modelled with a Poisson regression, a Generalized Linear Model form of regression that assumes that the response variable has a Poisson distribution. A bootstrap resampling has been applied to compute the 95% confidence interval for the Poisson regression coefficients, verifying that it does not include zero. In addition, the Deviance test that determines whether the model fits significantly better than a constant model has been applied, resulting in p-values =  $7.4791e-04$  for the WT4 March-August model and  $1.7074e-04$  for the WT2 January-March model.

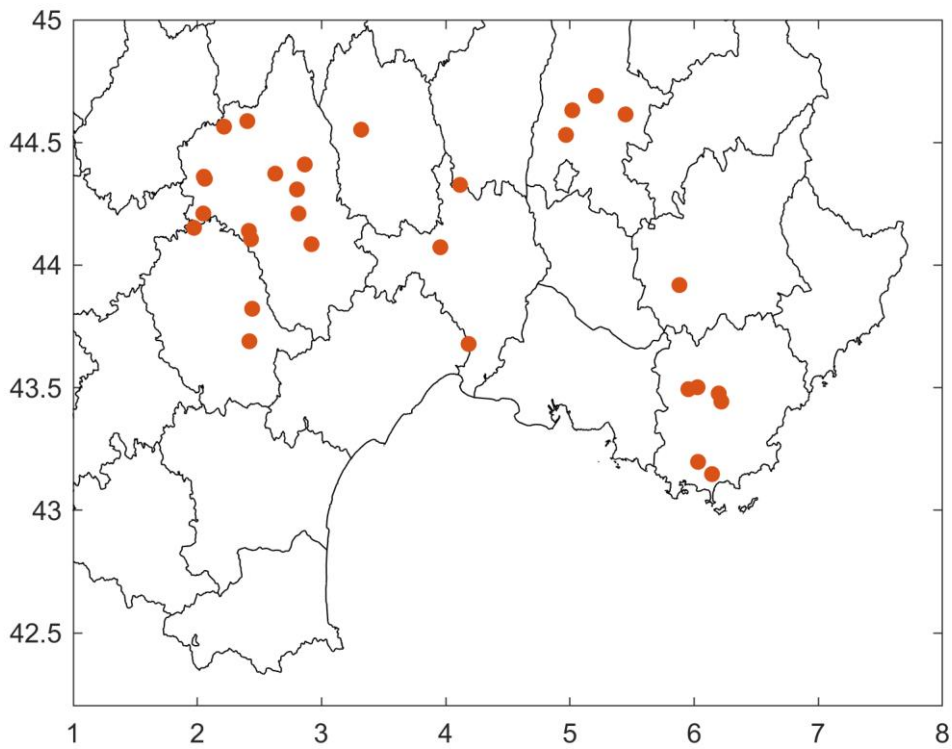

Figure S3: Locations of basins where the relative frequency of excess rain floods is above 80% (30 basins)

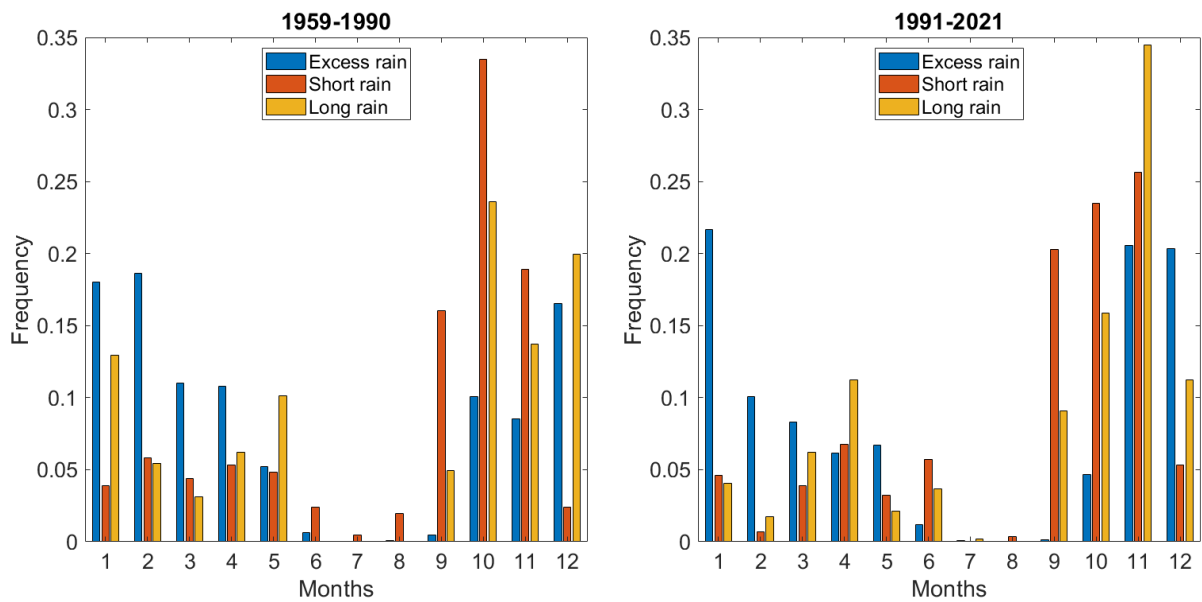

Figure S4: Monthly frequency of flood types between 1958-1990 and 1991-2021

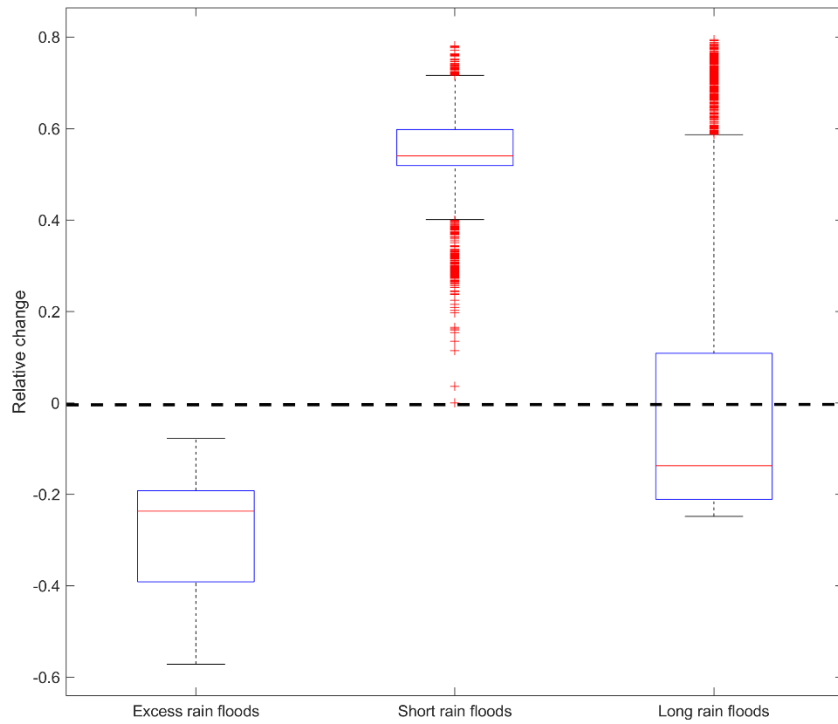

Figure S5: Relative changes in the regional frequency of excess rain floods, short rain floods and long rain floods, given a range of classification thresholds analyzed via a Monte Carlo experiment (using 5000 experiments with these threshold ranges: Extreme rainfall [0.7 1], Soil Wetness Index [0.4 1]). For each box, the central mark indicates the median, and the bottom and top edges of the box indicate the 25th and 75th percentiles, respectively. The whiskers extend to the 99% of the data and the 1% outliers are plotted with the '+' marker symbol.

Table S1: List of selected catchments

| Name                                               | Station code | Longitude (wgs84) | Latitude (wgs84) | Catchment area (km <sup>2</sup> ) |
|----------------------------------------------------|--------------|-------------------|------------------|-----------------------------------|
| LArdeche à Pont-de-Labeaume                        | V5004010'    | 4.30              | 44.66            | 424.529                           |
| LArdeche à Vogué                                   | 'V5014010'   | 4.41              | 44.56            | 891.224                           |
| LAltier à Altier [La Goulette]                     | 'V5046610'   | 3.89              | 44.46            | 152.605                           |
| LARDECHE à SAINT-MARTIN-DARDECHE [SAUZE-ST-MARTIN] | 'V5064010'   | 4.54              | 44.32            | 3195.527                          |
| Le Toulourenc à Malaucene [Veaux]                  | 'V6035010'   | 5.21              | 44.21            | 249.189                           |
| Le Lauzon à Villeneuve                             | 'X1335010'   | 5.88              | 43.92            | 218.244                           |
| LAsse à Beynes [Chabrieres]                        | 'X1424010'   | 6.25              | 44.02            | 520.52                            |
| La Têt [partielle] à Perpignan                     | 'Y0474030'   | 2.89              | 42.71            | 1864.007                          |
| LAgly à Estagel [Mas de Jau]                       | 'Y0664040'   | 2.72              | 42.78            | 1245.183                          |
| Le Fresquel à Villepinte                           | 'Y1314010'   | 2.08              | 43.28            | 323.193                           |
| LORB à VIEUSSAN                                    | Y2554010'    | 2.98              | 43.54            | 1313.918                          |
| Le Vidourle à Marsillargues                        | 'Y3464010'   | 4.18              | 43.68            | 1127.742                          |
| LArgens à Carces [aval]                            | 'Y5112010'   | 6.20              | 43.48            | 1599.405                          |
| La Siagne à Pégomas                                | 'Y5534030'   | 6.93              | 43.59            | 598.008                           |
| Le Langouyrou à Langogne                           | 'K2064010'   | 3.86              | 44.73            | 99.061                            |
| La Clamouse à Chastanier                           | 'K2134010'   | 3.77              | 44.73            | 62.547                            |
| Le Blau à Chalabre                                 | 'O1464010'   | 2.02              | 42.98            | 92.565                            |
| La Goudech à Saint-Maurice-de-Ventalon [La Cépede] | 'O3006710'   | 3.79              | 44.34            | 14.136                            |
| Le Tarn au Pont-de-Montvert [Fontchalettes]        | 'O3011010'   | 3.76              | 44.36            | 82.782                            |
| Le Rieumalet au Pont-de-Montvert                   | 'O3015520'   | 3.75              | 44.37            | 116.304                           |
| Le Tarn à Bédoues [Cocures]                        | 'O3031010'   | 3.62              | 44.35            | 300.528                           |
| Le Brianaon aux Bondons [Cocures]                  | 'O3035210'   | 3.61              | 44.36            | 36.848                            |
| Le Tarnon à Florac                                 | 'O3064010'   | 3.60              | 44.31            | 189.175                           |
| La Mimente à Florac                                | 'O3084320'   | 3.61              | 44.32            | 157.23                            |
| Le Tarn à Montbrun [Pont de Montbrun]              | 'O3121010'   | 3.49              | 44.34            | 865.888                           |
| Le Tarn à Mostuéjols [La Muse]                     | 'O3141010'   | 3.23              | 44.22            | 1404.289                          |
| La Breze à Meyrueis                                | 'O3165010'   | 3.44              | 44.18            | 42.316                            |
| La Jonte à Meyrueis [aval]                         | 'O3194010'   | 3.43              | 44.18            | 136.271                           |
| La Dourbie à Dourbies [Le Mazet-récent]            | 'O3314010'   | 3.46              | 44.07            | 61.705                            |
| La Dourbie à Nant [Pont de Gardies]                | 'O3364010'   | 3.29              | 44.08            | 629.914                           |
| Le Tarn à Millau [2]                               | O3401010'    | 3.07              | 44.09            | 3170.058                          |
| La Muze à Montjoux [Saint-Hippolyte]               | 'O3454310'   | 2.92              | 44.09            | 159.495                           |
| LAgout à Fraisse-sur-Agout                         | O4102510'    | 2.81              | 43.62            | 29.801                            |
| Le Gijou à Vabre [Rocalé]                          | 'O4194310'   | 2.42              | 43.69            | 289.605                           |
| Le Dadou à Paulinet [Saint-Jean-de-Jeanne]         | 'O4704030'   | 2.44              | 43.82            | 49.003                            |
| Le Serre à Coussergues [Resuenhe]                  | 'O5055010'   | 2.86              | 44.41            | 36.123                            |
| L'Aveyron à Onet-le-Chateau [Rodez]                | 'O5092520'   | 2.63              | 44.37            | 709.266                           |
| L'Aveyron à Villefranche-de-Rouergue [Recoules]    | 'O5192520'   | 2.06              | 44.35            | 1372.823                          |
| L'Alzou à Villefranche-de-Rouergue [barrage Cabal] | 'O5224010'   | 2.05              | 44.36            | 292.046                           |
| La Serene à Saint-André-de-Najac [Canabral]        | 'O5284310'   | 2.05              | 44.21            | 148.873                           |
| L'Aveyron à Laguépie [1]                           | 'O5292510'   | 1.97              | 44.15            | 2165.787                          |
| Le Viaur à Arques                                  | 'O5312910'   | 2.80              | 44.31            | 180.512                           |
| Le Vioulou à Salles-Curan [Trébons-Bas]            | 'O5344010'   | 2.81              | 44.21            | 80.503                            |

|                                                        |            |      |       |          |
|--------------------------------------------------------|------------|------|-------|----------|
| Le Céor à Centres [Lestrebaldie]                       | 'O5424010' | 2.41 | 44.14 | 234.279  |
| Le Giffou à Saint-Just-sur-Viaur [La Fabreguerie]      | 'O5464310' | 2.43 | 44.11 | 222.379  |
| Le Bramont à Saint-Bauzile [Les Fonts]                 | 'O7035010' | 3.48 | 44.47 | 131.761  |
| Le Lot à Balsieges [Bramonas]                          | 'O7041510' | 3.42 | 44.49 | 678.166  |
| Le Coulagnet à Marvejols                               | 'O7085010' | 3.32 | 44.55 | 114.106  |
| Le Lot à Banassac [La Mothe]                           | 'O7101510' | 3.20 | 44.44 | 1659.843 |
| Le Dourdou à Conques                                   | 'O7874010' | 2.40 | 44.59 | 818.424  |
| Le Rieu-Mort à Viviez [2]                              | 'O7944020' | 2.21 | 44.56 | 271.221  |
| La Drôme à Luc-en-Diois                                | 'V4214010' | 5.45 | 44.61 | 278.286  |
| La Drôme à Saillans                                    | 'V4264010' | 5.21 | 44.69 | 1633.187 |
| Le Roubion à Soyans                                    | 'V4414010' | 5.02 | 44.63 | 294.712  |
| Le Jabron à Souspierre                                 | 'V4455010' | 4.97 | 44.53 | 191.256  |
| Le Borne à Saint-Laurent-les-Bains [Pont de Nicoulaud] | 'V5045810' | 3.96 | 44.58 | 85.973   |
| La Gagniere à Gagnieres [Bannes]                       | 'V5425210' | 4.11 | 44.33 | 71.836   |
| La Ceze à la Roque-sur-Ceze                            | 'V5474010' | 4.52 | 44.21 | 1473.942 |
| LOuveze à Vaison-la-Romaine                            | 'V6052010' | 5.07 | 44.24 | 852.264  |
| LAuzon à Mormoiron                                     | 'V6125010' | 5.19 | 44.06 | 145.033  |
| Le Gardon de Sainte-Croix à Gabriac [Pont Ravagers]    | 'V7115010' | 3.72 | 44.19 | 68.229   |
| Le Gardon de Mialet à Générargues [Roucan]             | 'V7124010' | 3.96 | 44.08 | 353.838  |
| Le Gardon de Saint-Jean à Corbes [Roc Courbe]          | 'V7135010' | 3.96 | 44.07 | 362.303  |
| LAsse à Beynes [Chabrieres]                            | 'X1424010' | 6.25 | 44.02 | 520.52   |
| Le Coulon à Saint-Martin-de-Castillon [Coste Raste]    | 'X3434010' | 5.52 | 43.85 | 483.142  |
| La Baillaury à Banyuls-sur-Mer                         | 'Y0105210' | 3.11 | 42.47 | 35.046   |
| La Massane à Argeles-sur-Mer [Mas den Tourens]         | 'Y0115410' | 2.99 | 42.53 | 17.363   |
| Le Mondony à Amélie-les-Bains-Palalda                  | 'Y0245210' | 2.67 | 42.47 | 39.454   |
| LAmple à Reynes [Le Vila]                              | 'Y0255020' | 2.70 | 42.50 | 63.686   |
| La Canterrane à Terrats [Moulin den Canterrane]        | 'Y0325010' | 2.74 | 42.60 | 46.208   |
| LAgly à Saint-Paul-de-Fenouillet [Clue de la Fou]      | 'Y0624020' | 2.51 | 42.81 | 238.068  |
| Le Verdoube à Tautavel                                 | 'Y0655010' | 2.74 | 42.81 | 476.468  |
| La Berre à Villeseque-des-Corbieres [Ripaud]           | 'Y0824010' | 2.84 | 43.04 | 251.709  |
| Le Treboul à Villepinte                                | 'Y1325010' | 2.07 | 43.28 | 231.692  |
| La Clamoux à Malves-en-Minervois                       | 'Y1416210' | 2.44 | 43.26 | 96.078   |
| LArgent Double à la Redorte [Les Salices]              | 'Y1435410' | 2.62 | 43.27 | 198.79   |
| LOrbieu à Luc-sur-Orbieu                               | 'Y1564010' | 2.78 | 43.18 | 825.161  |
| LArre au Vigan [La Terrisse]                           | 'Y2015010' | 3.66 | 44.00 | 218.422  |
| La Vis à Saint-Laurent-le-Minier                       | 'Y2035010' | 3.68 | 43.94 | 712.973  |
| LHérault à Laroque                                     | 'Y2102010' | 3.70 | 43.92 | 1295.549 |
| La Lergue à Lodeve                                     | 'Y2214010' | 3.32 | 43.73 | 245.37   |
| La Mare au Pradal                                      | 'Y2525010' | 3.11 | 43.63 | 163.555  |
| Le Lez à Montferrier-sur-Lez [Lavalette]               | 'Y3204010' | 3.87 | 43.65 | 178.515  |
| LArc à Pourrières                                      | 'Y4002010' | 5.73 | 43.49 | 68.023   |
| LArc à Meyreuil [Pont de Bayeux]                       | 'Y4022010' | 5.52 | 43.50 | 425.522  |
| Le Gapeau à Sollies-Pont                               | 'Y4604020' | 6.03 | 43.20 | 275.32   |
| Le Réal Martin à la Crau [Decapris]                    | 'Y4615020' | 6.11 | 43.19 | 379.106  |
| Le Gapeau à Hyeres [Sainte-Eulalie]                    | 'Y4624010' | 6.14 | 43.15 | 480.707  |
| Le Cauron à Bras [Pont de l'Avocade]                   | 'Y5005210' | 5.95 | 43.49 | 198.59   |

|                                               |            |      |       |         |
|-----------------------------------------------|------------|------|-------|---------|
| LArgens à Chateauvert                         | 'Y5032010' | 6.03 | 43.50 | 714.003 |
| Le Caramy à Vins-sur-Caramy [Les Marcounious] | 'Y5105010' | 6.17 | 43.44 | 284.139 |
| Llssole à Cabasse [Pont des Fées]             | 'Y5106610' | 6.22 | 43.44 | 337.121 |
| LAille à Vidauban [Le Baou]                   | 'Y5215020' | 6.43 | 43.40 | 243.538 |
| La Nartuby à Trans-en-Provence                | 'Y5235010' | 6.48 | 43.51 | 261.951 |
| La Môle au Lavandou [Destel]                  | 'Y5435010' | 6.44 | 43.20 | 60.051  |
| Le Grenouiller à Saint-Raphaël [Agay]         | 'Y5505410' | 6.85 | 43.44 | 62.658  |
| Le Loup à Tourrettes-sur-Loup [Les Vallettes] | 'Y5615010' | 7.01 | 43.70 | 274.138 |
| Le Loup à Gourdon [Loup amont]                | 'Y5615020' | 6.98 | 43.71 | 38.889  |
